# Supplementary material for: Wide ecological niches ensure frequent harmful dinoflagellate blooms
Source: PubMed Central journal article supplement — Heliyon. 2024 Feb 18;10(4):e26495. doi: 10.1016/j.heliyon.2024.e26495 (PMC10884921; doi:10.1016/j.heliyon.2024.e26495), 2024-02-18

# Appendix

## Supplementary materials – 1

### Tables S1 – S2

Article:

#### **Wide ecological niches ensure frequent harmful dinoflagellate blooms**

Irena Telesh <sup>a,\*</sup>, Hendrik Schubert <sup>b</sup> and Sergei Skarlato <sup>c</sup>

<sup>a</sup> *Zoological Institute of the Russian Academy of Sciences, St. Petersburg 199034, Russia*

<sup>b</sup> *Institute of Biological Sciences, University of Rostock, Rostock 18059, Germany*

<sup>c</sup> *Institute of Cytology of the Russian Academy of Sciences, St. Petersburg 194064, Russia*

\* Corresponding author, E-mail address: [Irena.Telesh@zin.ru](mailto:Irena.Telesh@zin.ru)

### Supplementary Table S1.

Dinoflagellate biovolume (BV,  $\text{mm}^3 \text{L}^{-1}$ ) classification (A) and representation (Number of datasets, n) of the most abundant species in the database (B).

| A. Biovolume classification of dinoflagellates |                                    |                                                 |
|------------------------------------------------|------------------------------------|-------------------------------------------------|
| BV class number                                | BV classes                         | BV class limits ( $\text{mm}^3 \text{L}^{-1}$ ) |
| 1                                              | rare                               | < 0.044                                         |
| 2                                              | present                            | 0.044 – < 0.12                                  |
| 3                                              | abundant                           | 0.12 – < 0.4                                    |
| 4                                              | very abundant                      | 0.4 – < 1.0                                     |
| 5                                              | plentiful                          | 1.0 – < 3.0                                     |
| 6                                              | blooming                           | $\geq 3.0$                                      |
| B. Representation of species in the database   |                                    |                                                 |
| Number of datasets (n)                         | Species                            | Maximum BV class                                |
| 448                                            | <i>Prorocentrum cordatum</i>       | 4                                               |
| 354                                            | <i>Ceratium tripos</i>             | 6                                               |
| 257                                            | <i>Ceratium fusus</i>              | 6                                               |
| 246                                            | <i>Dinophysis norvegica</i>        | 6                                               |
| 243                                            | <i>Prorocentrum micans</i>         | 5                                               |
| 232                                            | <i>Dinophysis acuminata</i>        | 5                                               |
| 229                                            | <i>Kryptoperidinium triquetrum</i> | 5                                               |
| 185                                            | <i>Protooperidinium pellucidum</i> | 5                                               |
| 126                                            | <i>Amphidinium crassum</i>         | 5                                               |
| 116                                            | <i>Protooperidinium bipes</i>      | 5                                               |
| 112                                            | <i>Ceratium lineatum</i>           | 6                                               |
| 103                                            | <i>Protooperidinium steinii</i>    | 5                                               |
| 98                                             | <i>Protooperidinium brevipes</i>   | 5                                               |
| 94                                             | <i>Proterothropsis vigilans</i>    | 5                                               |
| 93                                             | <i>Gyrodinium spirale</i>          | 6                                               |
| 60                                             | <i>Protooperidinium conicum</i>    | 6                                               |
| 52                                             | <i>Ceratium furca</i>              | 6                                               |

## Supplementary Table S2.

Results of the Principal Component Analysis showing contribution of 12 main environmental variables to preferable ecological conditions (niches) for major bloom-forming dinoflagellate species in the Baltic coastal waters. Maximum Eigenvectors are highlighted in bold font.

### A. PCA results for a total of 14 species

Total (altogether 14 species)

Data worksheet  
Name: Data22  
Data type: Other  
Sample selection: All  
Variable selection: All

#### Eigenvalues

| PC | Eigenvalues | %Variation | Cum.%Variation |
|----|-------------|------------|----------------|
| 1  | 5,12        | 42,7       | 42,7           |
| 2  | 1,77        | 14,7       | 57,4           |
| 3  | 1,57        | 13,1       | 70,5           |
| 4  | 0,868       | 7,2        | 77,7           |
| 5  | 0,733       | 6,1        | 83,9           |

#### Eigenvectors

(Coefficients in the linear combinations of variables making up PC's)

| Variable     | PC1           | PC2           | PC3           | PC4           | PC5          |
|--------------|---------------|---------------|---------------|---------------|--------------|
| T water      | 0,050         | <b>-0,515</b> | 0,080         | 0,385         | <b>0,615</b> |
| Salinity     | 0,258         | 0,185         | -0,431        | -0,006        | 0,214        |
| Secchi depth | 0,273         | 0,253         | -0,329        | 0,177         | -0,169       |
| Chl a        | -0,289        | -0,154        | 0,247         | -0,384        | 0,230        |
| PO4          | -0,279        | -0,273        | <b>-0,455</b> | 0,029         | -0,204       |
| Total P      | -0,339        | -0,269        | -0,289        | 0,030         | -0,035       |
| Total N      | <b>-0,413</b> | 0,129         | 0,069         | 0,117         | 0,076        |
| DIN          | -0,355        | 0,371         | 0,086         | 0,304         | 0,057        |
| NO2          | -0,313        | 0,397         | 0,242         | 0,266         | 0,003        |
| NO3          | -0,150        | 0,334         | -0,298        | <b>-0,557</b> | 0,518        |
| NH4          | -0,265        | 0,024         | -0,429        | 0,329         | 0,126        |
| SiO4         | -0,305        | -0,204        | -0,064        | -0,276        | -0,398       |

## B. PCA results for individual species

### *Amphidinium crassum*

Data worksheet

Name: Data1

Data type: Other

Sample selection: All

Variable selection: All

#### Eigenvalues

| PC | Eigenvalues | %Variation | Cum.%Variation |
|----|-------------|------------|----------------|
| 1  | 6,18        | 51,5       | 51,5           |
| 2  | 2,06        | 17,2       | 68,7           |
| 3  | 1,21        | 10,1       | 78,8           |
| 4  | 0,989       | 8,2        | 87,0           |
| 5  | 0,606       | 5,0        | 92,1           |

#### Eigenvectors

(Coefficients in the linear combinations of variables making up PC's)

| Variable     | PC1           | PC2          | PC3           | PC4          | PC5           |
|--------------|---------------|--------------|---------------|--------------|---------------|
| T water      | 0,116         | 0,311        | <b>-0,576</b> | -0,522       | -0,172        |
| Salinity     | 0,224         | 0,263        | -0,325        | 0,449        | <b>-0,497</b> |
| Secchi depth | 0,294         | 0,058        | -0,081        | <b>0,532</b> | -0,160        |
| Chl a        | -0,303        | -0,196       | -0,433        | -0,059       | -0,119        |
| PO4          | -0,259        | 0,442        | 0,303         | -0,022       | -0,186        |
| Total P      | -0,330        | 0,352        | 0,003         | -0,056       | -0,109        |
| Total N      | -0,364        | 0,014        | -0,176        | 0,084        | 0,152         |
| DIN          | <b>-0,365</b> | -0,167       | -0,221        | 0,170        | -0,013        |
| NO2          | -0,280        | -0,439       | -0,220        | 0,129        | -0,138        |
| NO3          | -0,320        | 0,105        | 0,050         | 0,381        | 0,179         |
| NH4          | -0,261        | <b>0,470</b> | -0,074        | 0,112        | 0,228         |
| SiO4         | -0,261        | -0,140       | 0,375         | -0,160       | -0,715        |

### *Ceratium fusus*

Data worksheet

Name: Data3

Data type: Other

Sample selection: All

Variable selection: All

#### Eigenvalues

| PC | Eigenvalues | %Variation | Cum.%Variation |
|----|-------------|------------|----------------|
| 1  | 3,77        | 31,4       | 31,4           |
| 2  | 2,03        | 16,9       | 48,3           |
| 3  | 1,68        | 14,0       | 62,3           |
| 4  | 1,12        | 9,3        | 71,7           |
| 5  | 1,03        | 8,6        | 80,3           |

#### Eigenvectors

(Coefficients in the linear combinations of variables making up PC's)

| Variable     | PC1           | PC2          | PC3           | PC4          | PC5           |
|--------------|---------------|--------------|---------------|--------------|---------------|
| T water      | 0,244         | -0,232       | 0,144         | -0,282       | -0,460        |
| Salinity     | -0,124        | <b>0,443</b> | -0,084        | <b>0,417</b> | 0,028         |
| Secchi depth | 0,081         | -0,202       | <b>-0,608</b> | 0,127        | 0,328         |
| Chl a        | -0,106        | 0,328        | 0,535         | 0,300        | -0,092        |
| PO4          | -0,232        | -0,414       | 0,254         | -0,064       | 0,425         |
| Total P      | -0,304        | -0,316       | 0,060         | 0,260        | 0,133         |
| Total N      | -0,388        | -0,111       | 0,275         | -0,387       | 0,073         |
| DIN          | <b>-0,429</b> | 0,237        | -0,236        | -0,256       | -0,100        |
| NO2          | -0,267        | -0,173       | -0,252        | 0,252        | <b>-0,533</b> |
| NO3          | -0,285        | 0,434        | -0,153        | -0,361       | 0,220         |
| NH4          | -0,386        | -0,125       | -0,154        | -0,117       | -0,352        |
| SiO4         | -0,353        | -0,166       | 0,076         | 0,382        | 0,033         |

**Ceratium lineatum**

Data worksheet

Name: Data5

Data type: Other

Sample selection: All

Variable selection: All

## Eigenvalues

| PC | Eigenvalues | %Variation | Cum.%Variation |
|----|-------------|------------|----------------|
| 1  | 4,48        | 40,7       | 40,7           |
| 2  | 1,64        | 14,9       | 55,6           |
| 3  | 1,48        | 13,4       | 69,0           |
| 4  | 1,36        | 12,4       | 81,4           |
| 5  | 0,7         | 6,4        | 87,8           |

## Eigenvectors

(Coefficients in the linear combinations of variables making up PC's)

| Variable     | PC1           | PC2           | PC3          | PC4           | PC5           |
|--------------|---------------|---------------|--------------|---------------|---------------|
| T water      | 0,275         | 0,196         | <b>0,383</b> | 0,213         | -0,592        |
| Salinity     | -0,147        | -0,192        | -0,552       | -0,118        | <b>-0,700</b> |
| Secchi depth | -0,093        | 0,530         | -0,485       | 0,054         | 0,062         |
| Chl a        | 0,029         | <b>-0,630</b> | 0,044        | -0,395        | -0,006        |
| Total P      | -0,329        | 0,137         | 0,036        | <b>-0,497</b> | -0,159        |
| Total N      | -0,352        | -0,221        | 0,324        | 0,277         | -0,079        |
| DIN          | <b>-0,451</b> | 0,039         | 0,064        | 0,188         | -0,029        |
| NO2          | -0,257        | 0,359         | 0,276        | -0,477        | 0,053         |
| NO3          | -0,342        | -0,142        | -0,188       | 0,433         | 0,089         |
| NH4          | -0,393        | 0,092         | 0,279        | 0,073         | -0,245        |
| SiO4         | -0,346        | -0,144        | -0,112       | -0,041        | 0,230         |

**Ceratium tripos**

Data worksheet

Name: Data6

Data type: Other

Sample selection: All

Variable selection: All

## Eigenvalues

| PC | Eigenvalues | %Variation | Cum.%Variation |
|----|-------------|------------|----------------|
| 1  | 3,39        | 28,2       | 28,2           |
| 2  | 2,18        | 18,2       | 46,4           |
| 3  | 1,5         | 12,5       | 58,9           |
| 4  | 1,17        | 9,8        | 68,6           |
| 5  | 1,01        | 8,4        | 77,1           |

## Eigenvectors

(Coefficients in the linear combinations of variables making up PC's)

| Variable     | PC1          | PC2          | PC3           | PC4           | PC5           |
|--------------|--------------|--------------|---------------|---------------|---------------|
| T water      | -0,239       | 0,311        | 0,194         | <b>-0,413</b> | 0,029         |
| Salinity     | 0,174        | -0,423       | 0,004         | 0,339         | -0,001        |
| Secchi depth | -0,113       | 0,114        | <b>-0,663</b> | 0,302         | -0,186        |
| Chl a        | 0,163        | -0,318       | 0,539         | 0,234         | 0,211         |
| PO4          | 0,233        | <b>0,464</b> | 0,155         | 0,253         | -0,255        |
| Total P      | 0,295        | 0,277        | -0,020        | 0,253         | 0,195         |
| Total N      | 0,357        | 0,240        | 0,248         | -0,258        | -0,254        |
| DIN          | <b>0,465</b> | -0,188       | -0,221        | -0,282        | -0,029        |
| NO2          | 0,229        | 0,058        | -0,235        | -0,129        | 0,760         |
| NO3          | 0,332        | -0,355       | -0,108        | -0,176        | <b>-0,414</b> |
| NH4          | 0,373        | 0,129        | -0,164        | -0,280        | 0,055         |
| SiO4         | 0,292        | 0,279        | 0,061         | 0,411         | 0,003         |

***Dinophysis acuminata***

Data worksheet

Name: Data8

Data type: Other

Sample selection: All

Variable selection: All

## Eigenvalues

| PC | Eigenvalues | %Variation | Cum.%Variation |
|----|-------------|------------|----------------|
| 1  | 4,56        | 41,5       | 41,5           |
| 2  | 2,77        | 25,2       | 66,7           |
| 3  | 1,28        | 11,6       | 78,3           |
| 4  | 0,764       | 6,9        | 85,2           |
| 5  | 0,59        | 5,4        | 90,6           |

## Eigenvectors

(Coefficients in the linear combinations of variables making up PC's)

| Variable     | PC1           | PC2          | PC3          | PC4           | PC5          |
|--------------|---------------|--------------|--------------|---------------|--------------|
| T water      | -0,225        | -0,295       | -0,108       | <b>-0,619</b> | -0,180       |
| Salinity     | 0,328         | 0,214        | -0,208       | -0,071        | -0,532       |
| Secchi depth | 0,312         | -0,072       | 0,251        | -0,397        | <b>0,674</b> |
| Chl a        | -0,396        | -0,113       | -0,282       | 0,163         | 0,005        |
| Total P      | -0,423        | -0,063       | -0,136       | -0,114        | 0,106        |
| Total N      | <b>-0,444</b> | -0,002       | -0,184       | 0,000         | 0,219        |
| DIN          | -0,105        | <b>0,576</b> | -0,007       | -0,039        | 0,120        |
| NO2          | -0,209        | 0,239        | <b>0,688</b> | 0,058         | -0,157       |
| NO3          | -0,015        | 0,496        | -0,328       | 0,192         | 0,318        |
| NH4          | -0,048        | 0,442        | -0,126       | -0,611        | -0,131       |
| SiO4         | -0,393        | 0,122        | 0,391        | -0,015        | -0,119       |

***Dinophysis norvegica***

Data worksheet

Name: Data9

Data type: Other

Sample selection: All

Variable selection: All

## Eigenvalues

| PC | Eigenvalues | %Variation | Cum.%Variation |
|----|-------------|------------|----------------|
| 1  | 3,65        | 33,2       | 33,2           |
| 2  | 1,8         | 16,4       | 49,6           |
| 3  | 1,6         | 14,6       | 64,1           |
| 4  | 1,12        | 10,2       | 74,3           |
| 5  | 0,79        | 7,2        | 81,5           |

## Eigenvectors

(Coefficients in the linear combinations of variables making up PC's)

| Variable     | PC1          | PC2          | PC3           | PC4           | PC5          |
|--------------|--------------|--------------|---------------|---------------|--------------|
| T water      | -0,181       | 0,007        | -0,387        | -0,485        | <b>0,626</b> |
| Salinity     | 0,248        | 0,303        | -0,272        | -0,223        | -0,406       |
| Secchi depth | -0,219       | 0,319        | 0,493         | -0,257        | -0,013       |
| Chl a        | 0,243        | -0,015       | <b>-0,514</b> | 0,455         | -0,079       |
| Total P      | 0,246        | <b>0,477</b> | 0,059         | -0,094        | -0,159       |
| Total N      | 0,383        | -0,389       | 0,020         | -0,056        | 0,267        |
| DIN          | <b>0,460</b> | -0,173       | 0,254         | -0,149        | 0,013        |
| NO2          | 0,306        | 0,256        | 0,112         | 0,091         | 0,369        |
| NO3          | 0,423        | -0,064       | 0,341         | 0,093         | 0,156        |
| NH4          | 0,186        | -0,342       | -0,132        | <b>-0,607</b> | -0,376       |
| SiO4         | 0,269        | 0,460        | -0,235        | -0,148        | 0,196        |

**Kryptoperidinium triquetrum**

Data worksheet

Name: Data10

Data type: Other

Sample selection: All

Variable selection: All

## Eigenvalues

| PC | Eigenvalues | %Variation | Cum.%Variation |
|----|-------------|------------|----------------|
| 1  | 6,95        | 58,0       | 58,0           |
| 2  | 1,88        | 15,7       | 73,6           |
| 3  | 1,25        | 10,4       | 84,0           |
| 4  | 0,85        | 7,1        | 91,1           |
| 5  | 0,389       | 3,2        | 94,3           |

## Eigenvectors

(Coefficients in the linear combinations of variables making up PC's)

| Variable     | PC1           | PC2          | PC3          | PC4          | PC5          |
|--------------|---------------|--------------|--------------|--------------|--------------|
| T water      | -0,117        | <b>0,553</b> | -0,266       | -0,379       | 0,137        |
| Salinity     | 0,222         | -0,428       | -0,072       | 0,345        | -0,202       |
| Secchi depth | 0,251         | -0,372       | -0,117       | -0,004       | <b>0,829</b> |
| Chl a        | -0,199        | 0,319        | 0,361        | <b>0,620</b> | 0,174        |
| PO4          | -0,345        | -0,164       | -0,281       | 0,063        | 0,010        |
| Total P      | -0,346        | -0,085       | -0,306       | 0,145        | -0,023       |
| Total N      | <b>-0,368</b> | -0,069       | -0,145       | 0,117        | 0,005        |
| DIN          | -0,355        | -0,207       | -0,027       | -0,176       | 0,068        |
| NO2          | -0,253        | -0,086       | <b>0,495</b> | -0,379       | 0,279        |
| NO3          | -0,215        | -0,359       | 0,469        | -0,217       | -0,277       |
| NH4          | -0,337        | -0,204       | -0,304       | -0,042       | -0,013       |
| SiO4         | -0,333        | 0,108        | 0,168        | 0,301        | 0,252        |

**Prorocentrum micans**

Data worksheet

Name: Data12

Data type: Other

Sample selection: All

Variable selection: All

## Eigenvalues

| PC | Eigenvalues | %Variation | Cum.%Variation |
|----|-------------|------------|----------------|
| 1  | 3,53        | 29,4       | 29,4           |
| 2  | 2,74        | 22,9       | 52,3           |
| 3  | 1,46        | 12,2       | 64,4           |
| 4  | 1,19        | 9,9        | 74,3           |
| 5  | 0,817       | 6,8        | 81,1           |

## Eigenvectors

(Coefficients in the linear combinations of variables making up PC's)

| Variable     | PC1           | PC2           | PC3           | PC4          | PC5          |
|--------------|---------------|---------------|---------------|--------------|--------------|
| T water      | -0,194        | 0,400         | -0,073        | 0,128        | 0,454        |
| Salinity     | 0,382         | -0,225        | -0,003        | -0,300       | 0,027        |
| Secchi depth | 0,381         | -0,086        | -0,391        | -0,125       | 0,215        |
| Chl a        | -0,314        | 0,068         | 0,501         | -0,271       | -0,224       |
| PO4          | -0,212        | 0,000         | <b>-0,626</b> | -0,297       | -0,170       |
| Total P      | -0,294        | 0,030         | 0,133         | -0,470       | 0,457        |
| Total N      | <b>-0,460</b> | -0,131        | -0,070        | -0,054       | -0,026       |
| DIN          | -0,106        | -0,577        | 0,058         | 0,060        | 0,088        |
| NO2          | -0,226        | -0,134        | -0,101        | <b>0,656</b> | -0,109       |
| NO3          | 0,013         | <b>-0,531</b> | 0,143         | -0,117       | -0,130       |
| NH4          | -0,213        | -0,355        | -0,105        | 0,131        | <b>0,556</b> |
| SiO4         | -0,349        | -0,017        | -0,362        | -0,170       | -0,335       |

**Prorocentrum cordatum**

Data worksheet

Name: Data14

Data type: Other

Sample selection: All

Variable selection: All

## Eigenvalues

| PC | Eigenvalues | %Variation | Cum.%Variation |
|----|-------------|------------|----------------|
| 1  | 3,93        | 32,8       | 32,8           |
| 2  | 2,26        | 18,8       | 51,6           |
| 3  | 1,32        | 11,0       | 62,6           |
| 4  | 1,1         | 9,2        | 71,8           |
| 5  | 0,937       | 7,8        | 79,6           |

## Eigenvectors

(Coefficients in the linear combinations of variables making up PC's)

| Variable     | PC1           | PC2          | PC3           | PC4           | PC5           |
|--------------|---------------|--------------|---------------|---------------|---------------|
| T water      | 0,095         | -0,157       | 0,088         | <b>-0,720</b> | <b>-0,485</b> |
| Salinity     | 0,184         | 0,403        | -0,184        | 0,172         | -0,453        |
| Secchi depth | 0,289         | <b>0,423</b> | -0,098        | -0,054        | 0,072         |
| Chl a        | -0,260        | -0,355       | 0,015         | 0,323         | -0,283        |
| PO4          | -0,217        | 0,053        | <b>-0,641</b> | -0,181        | 0,228         |
| Total P      | -0,251        | -0,188       | -0,342        | -0,136        | -0,444        |
| Total N      | <b>-0,456</b> | -0,008       | 0,013         | 0,029         | 0,018         |
| DIN          | -0,367        | 0,369        | 0,294         | -0,165        | -0,012        |
| NO2          | -0,322        | 0,297        | 0,475         | -0,125        | -0,059        |
| NO3          | -0,144        | 0,363        | -0,144        | 0,392         | -0,406        |
| NH4          | -0,282        | 0,306        | -0,297        | -0,284        | 0,212         |
| SiO4         | -0,386        | -0,145       | 0,013         | 0,125         | 0,107         |

**Proterothopsis vigilans** (version 1)

Data worksheet

Name: Data21

Data type: Other

Sample selection: All

Variable selection: All

## Eigenvalues

| PC | Eigenvalues | %Variation | Cum.%Variation |
|----|-------------|------------|----------------|
| 1  | 5,01        | 45,6       | 45,6           |
| 2  | 2,00        | 18,2       | 63,8           |
| 3  | 1,68        | 15,3       | 79,0           |
| 4  | 0,725       | 6,6        | 85,6           |
| 5  | 0,595       | 5,4        | 91,0           |

## Eigenvectors

(Coefficients in the linear combinations of variables making up PC's)

| Variable     | PC1           | PC2          | PC3          | PC4          | PC5           |
|--------------|---------------|--------------|--------------|--------------|---------------|
| T water      | 0,197         | 0,302        | 0,225        | <b>0,681</b> | <b>-0,573</b> |
| Salinity     | -0,278        | -0,038       | 0,288        | -0,573       | -0,568        |
| Secchi depth | -0,048        | <b>0,615</b> | -0,176       | -0,152       | 0,154         |
| Chl a        | -0,015        | -0,540       | 0,383        | 0,122        | 0,050         |
| Total P      | -0,247        | 0,345        | 0,439        | -0,123       | -0,055        |
| Total N      | -0,406        | -0,130       | -0,093       | 0,263        | 0,120         |
| DIN          | <b>-0,422</b> | -0,040       | -0,203       | 0,148        | -0,056        |
| NO2          | -0,388        | -0,042       | -0,089       | 0,081        | -0,206        |
| NO3          | -0,390        | -0,155       | -0,272       | 0,142        | -0,153        |
| NH4          | -0,374        | 0,265        | 0,025        | 0,121        | 0,227         |
| SiO4         | -0,188        | 0,055        | <b>0,603</b> | 0,148        | 0,429         |



**Protoperidinium bipes**

Data worksheet

Name: Data16

Data type: Other

Sample selection: All

Variable selection: All

## Eigenvalues

| PC | Eigenvalues | %Variation | Cum.%Variation |
|----|-------------|------------|----------------|
| 1  | 5,00        | 45,4       | 45,4           |
| 2  | 2,25        | 20,4       | 65,9           |
| 3  | 1,35        | 12,3       | 78,1           |
| 4  | 1,09        | 9,9        | 88,1           |
| 5  | 0,428       | 3,9        | 92,0           |

## Eigenvectors

(Coefficients in the linear combinations of variables making up PC's)

| Variable     | PC1           | PC2           | PC3          | PC4           | PC5          |
|--------------|---------------|---------------|--------------|---------------|--------------|
| T water      | 0,112         | 0,206         | -0,073       | <b>-0,822</b> | -0,441       |
| Salinity     | -0,311        | -0,323        | 0,201        | -0,135        | 0,260        |
| Secchi depth | 0,087         | 0,554         | 0,367        | 0,051         | 0,146        |
| Chl a        | -0,139        | <b>-0,601</b> | 0,041        | -0,084        | -0,137       |
| Total P      | -0,349        | -0,138        | 0,347        | -0,190        | 0,072        |
| Total N      | -0,379        | 0,002         | -0,392       | -0,021        | -0,158       |
| DIN          | <b>-0,404</b> | 0,208         | -0,228       | -0,006        | 0,027        |
| NO2          | -0,323        | 0,199         | 0,199        | 0,378         | -0,365       |
| NO3          | -0,384        | 0,146         | -0,175       | 0,140         | -0,371       |
| NH4          | -0,320        | 0,236         | -0,277       | -0,248        | <b>0,627</b> |
| SiO4         | -0,284        | 0,082         | <b>0,587</b> | -0,189        | -0,054       |

**Protoperidinium brevipes**

Data worksheet

Name: Data18

Data type: Other

Sample selection: All

Variable selection: All

## Eigenvalues

| PC | Eigenvalues | %Variation | Cum.%Variation |
|----|-------------|------------|----------------|
| 1  | 3,79        | 34,4       | 34,4           |
| 2  | 2,52        | 22,9       | 57,4           |
| 3  | 1,28        | 11,7       | 69,0           |
| 4  | 1,19        | 10,8       | 79,9           |
| 5  | 0,814       | 7,4        | 87,3           |

## Eigenvectors

(Coefficients in the linear combinations of variables making up PC's)

| Variable     | PC1           | PC2           | PC3          | PC4           | PC5           |
|--------------|---------------|---------------|--------------|---------------|---------------|
| T water      | 0,248         | -0,193        | 0,215        | -0,142        | <b>-0,823</b> |
| Salinity     | -0,086        | -0,474        | 0,361        | 0,176         | 0,040         |
| Secchi depth | 0,260         | 0,215         | <b>0,578</b> | 0,187         | 0,192         |
| Chl a        | -0,154        | -0,443        | -0,471       | 0,047         | -0,113        |
| Total P      | 0,076         | -0,486        | 0,040        | -0,004        | 0,365         |
| Total N      | -0,472        | -0,062        | 0,000        | -0,198        | -0,138        |
| DIN          | <b>-0,488</b> | 0,057         | 0,184        | -0,083        | 0,064         |
| NO2          | -0,348        | 0,011         | 0,286        | 0,428         | -0,298        |
| NO3          | -0,481        | 0,076         | 0,089        | 0,155         | 0,057         |
| NH4          | -0,116        | -0,045        | 0,309        | <b>-0,810</b> | 0,078         |
| SiO4         | 0,093         | <b>-0,494</b> | 0,217        | 0,052         | 0,129         |

**Protoperidinium pellucidum**

Data worksheet

Name: Data19

Data type: Other

Sample selection: All

Variable selection: All

## Eigenvalues

| PC | Eigenvalues | %Variation | Cum.%Variation |
|----|-------------|------------|----------------|
| 1  | 7,05        | 58,7       | 58,7           |
| 2  | 2,01        | 16,8       | 75,5           |
| 3  | 1,3         | 10,9       | 86,4           |
| 4  | 0,759       | 6,3        | 92,7           |
| 5  | 0,491       | 4,1        | 96,8           |

## Eigenvectors

(Coefficients in the linear combinations of variables making up PC's)

| Variable     | PC1           | PC2           | PC3           | PC4          | PC5           |
|--------------|---------------|---------------|---------------|--------------|---------------|
| T water      | -0,062        | 0,111         | <b>-0,671</b> | <b>0,654</b> | 0,213         |
| Salinity     | 0,084         | <b>-0,553</b> | -0,029        | 0,353        | <b>-0,678</b> |
| Secchi depth | 0,161         | 0,477         | 0,330         | 0,182        | -0,430        |
| Chl a        | -0,142        | -0,479        | -0,312        | -0,462       | -0,058        |
| PO4          | -0,369        | 0,109         | -0,006        | -0,083       | -0,053        |
| Total P      | -0,353        | 0,043         | -0,013        | 0,075        | -0,317        |
| Total N      | <b>-0,372</b> | -0,009        | 0,072         | 0,024        | 0,097         |
| DIN          | -0,360        | -0,068        | 0,205         | 0,151        | 0,075         |
| NO2          | -0,371        | 0,097         | 0,013         | -0,069       | -0,050        |
| NO3          | -0,064        | -0,432        | 0,540         | 0,387        | 0,409         |
| NH4          | -0,368        | 0,071         | 0,041         | 0,096        | -0,078        |
| SiO4         | -0,371        | 0,080         | -0,034        | -0,026       | -0,112        |

**Protoperidinium steinii**

Data worksheet

Name: Data20

Data type: Other

Sample selection: All

Variable selection: All

## Eigenvalues

| PC | Eigenvalues | %Variation | Cum.%Variation |
|----|-------------|------------|----------------|
| 1  | 4,7         | 42,7       | 42,7           |
| 2  | 2,24        | 20,3       | 63,1           |
| 3  | 1,09        | 9,9        | 72,9           |
| 4  | 1,04        | 9,5        | 82,4           |
| 5  | 0,579       | 5,3        | 87,7           |

## Eigenvectors

(Coefficients in the linear combinations of variables making up PC's)

| Variable     | PC1           | PC2           | PC3           | PC4           | PC5           |
|--------------|---------------|---------------|---------------|---------------|---------------|
| T water      | 0,052         | -0,366        | <b>-0,661</b> | -0,286        | 0,306         |
| Salinity     | -0,235        | -0,382        | 0,105         | -0,456        | 0,129         |
| Secchi depth | 0,058         | 0,499         | 0,239         | <b>-0,468</b> | 0,166         |
| Chl a        | -0,040        | <b>-0,522</b> | 0,337         | 0,323         | 0,130         |
| Total P      | -0,306        | -0,149        | 0,522         | -0,167        | 0,374         |
| Total N      | -0,389        | 0,003         | -0,221        | 0,393         | 0,202         |
| DIN          | <b>-0,437</b> | 0,168         | -0,065        | 0,093         | 0,036         |
| NO2          | -0,352        | 0,185         | -0,157        | -0,076        | -0,155        |
| NO3          | -0,401        | 0,185         | 0,000         | 0,253         | -0,018        |
| NH4          | -0,375        | 0,075         | -0,168        | -0,255        | 0,159         |
| SiO4         | -0,276        | -0,275        | 0,052         | -0,249        | <b>-0,783</b> |

### Supplementary Table S3.

The list of most common dinoflagellate species with the widest ecological niches in the Baltic coastal waters. The width of temperature (T), salinity (S), total nitrogen (TN) and total phosphorus (TP) niches of each species is ranked from 1 to 5 based on the data given in **Table 2**.

Species are ranked (№) according to the number (n) of the widest niches that they occupy in the study region. The top-5 species with the highest number of the widest individual niches are highlighted in bold.

| №        | Dinoflagellates                     | Species niche-width rank (1–5) |         |          |          | Number of widest niches, n (%) |
|----------|-------------------------------------|--------------------------------|---------|----------|----------|--------------------------------|
|          |                                     | T niche                        | S niche | TN niche | TP niche |                                |
| <b>1</b> | <b><i>Dinophysis acuminata</i></b>  | 2                              | 2       | 5        | 3        | <b>4 (100)</b>                 |
| <b>2</b> | <b><i>Prorocentrum cordatum</i></b> | 1                              |         | 4        | 2        | <b>3 (75)</b>                  |
| <b>3</b> | <b><i>Amphidinium crassum</i></b>   |                                | 3       | 1        | 1        | <b>3 (75)</b>                  |
| <b>4</b> | <b><i>Ceratium tripos</i></b>       | 5                              |         | 3        | 5        | <b>3 (75)</b>                  |
| <b>5</b> | <b><i>Prorocentrum micans</i></b>   |                                | 1       |          | 4        | <b>2 (50)</b>                  |
| 6        | <i>Proterothropsis vigilans</i>     | 3                              |         |          |          | 1 (25)                         |
| 7        | <i>Dinophysis norvegica</i>         | 4                              |         |          |          | 1 (25)                         |
| 8        | <i>Protoperidinium brevipes</i>     |                                | 4       |          |          | 1 (25)                         |
| 9        | <i>Ceratium lineatum</i>            |                                | 5       |          |          | 1 (25)                         |
| 10       | <i>Ceratium furca</i>               |                                |         | 2        |          | 1 (25)                         |

## Supplementary materials – 2

### Figures S1 – S3

Article:

#### **Wide ecological niches ensure frequent harmful dinoflagellate blooms**

Irena Telesh <sup>a,\*</sup>, Hendrik Schubert <sup>b</sup> and Sergei Skarlato <sup>c</sup>

<sup>a</sup> *Zoological Institute of the Russian Academy of Sciences, St. Petersburg 199034, Russia*

<sup>b</sup> *Institute of Biological Sciences, University of Rostock, Rostock 18059, Germany*

<sup>c</sup> *Institute of Cytology of the Russian Academy of Sciences, St. Petersburg 194064, Russia*

\* Corresponding author, E-mail address: [Irena.Telesh@zin.ru](mailto:Irena.Telesh@zin.ru)

### Supplementary Figure S1.

The Gaussian-model approach: conformity of the original field data on the species' biovolume (upper panels) and biovolume-class distribution (lower panels) of the selected bloom-forming dinoflagellate species to the Gaussian distribution model (curve) in the gradients of environmental parameters (T water, salinity, total P, total N,  $\text{NO}_3^-$ ,  $\text{NH}_4^+$ ,  $\text{PO}_4^{3-}$  and  $\text{SiO}_4^{4-}$ ).

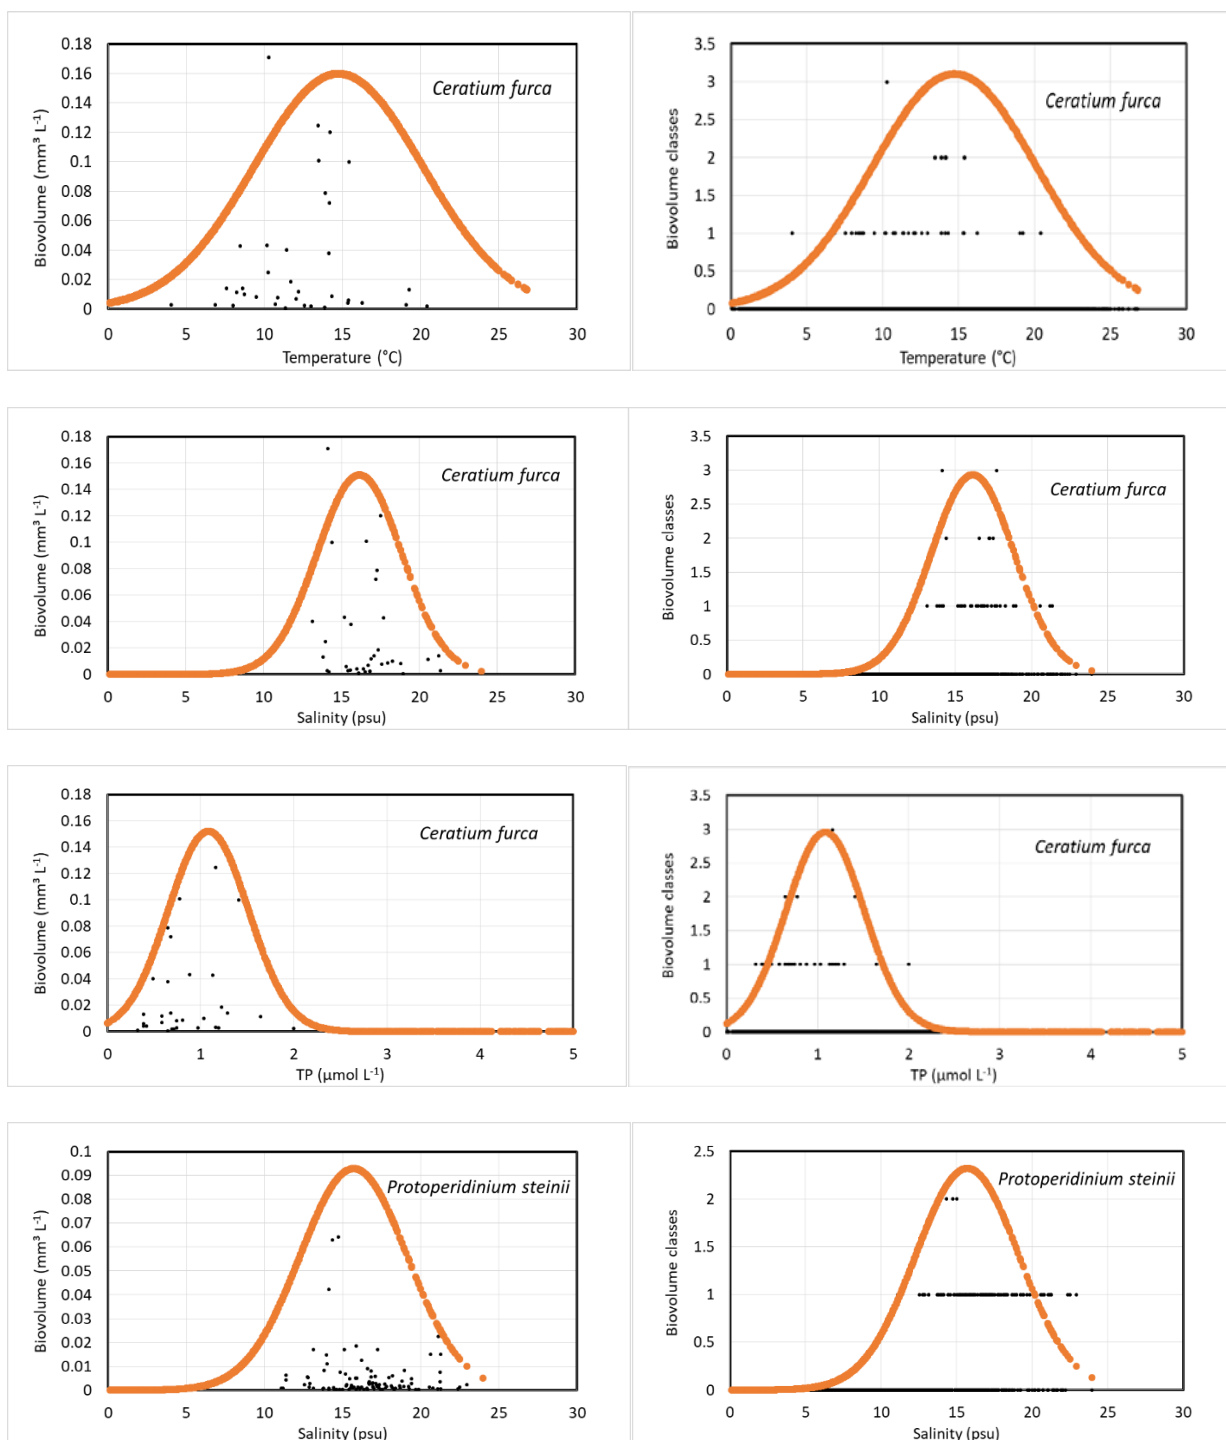

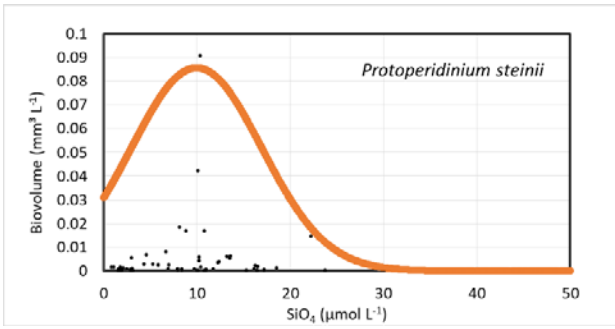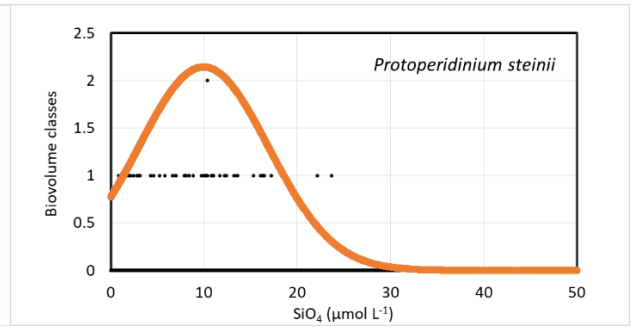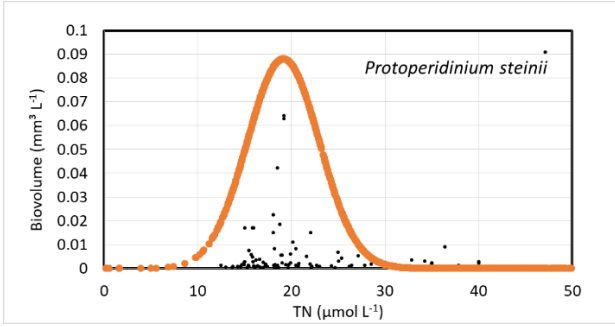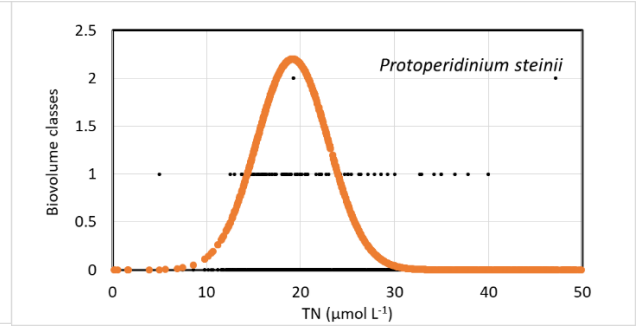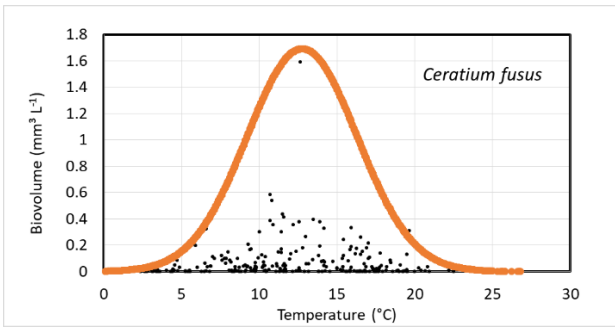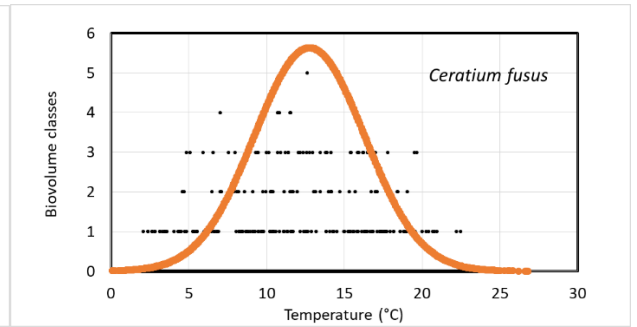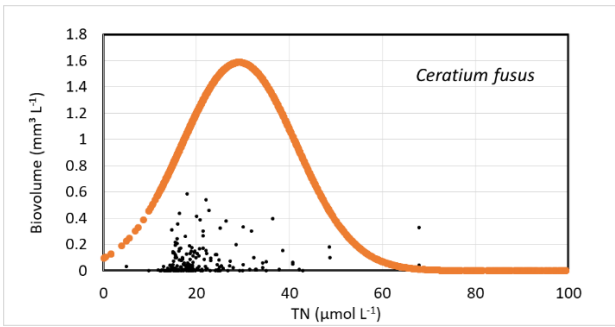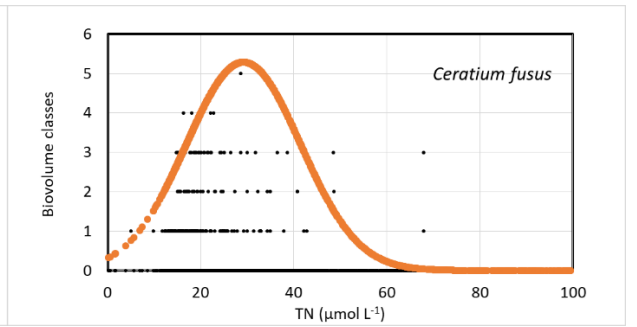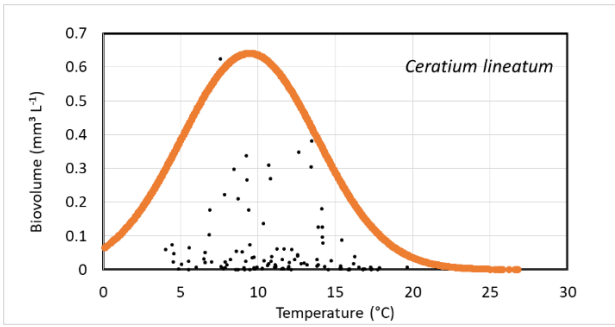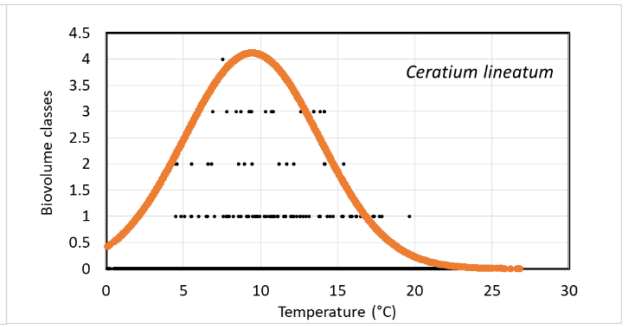

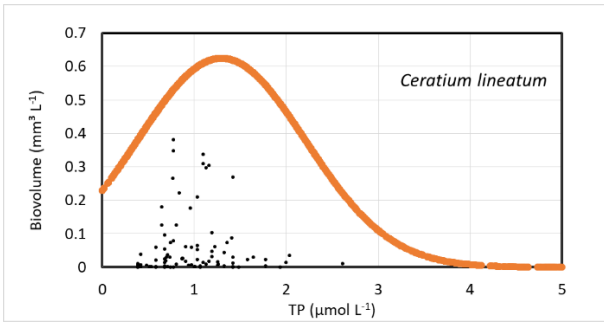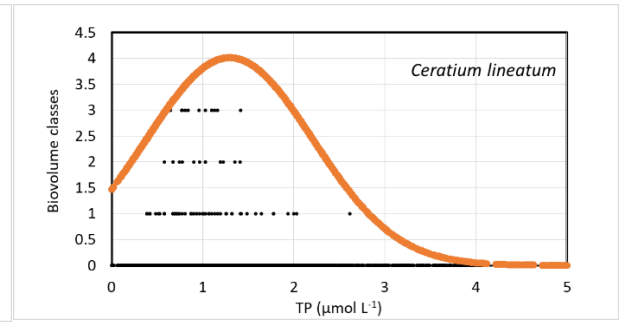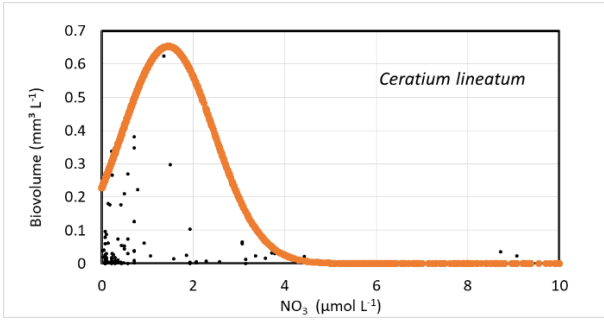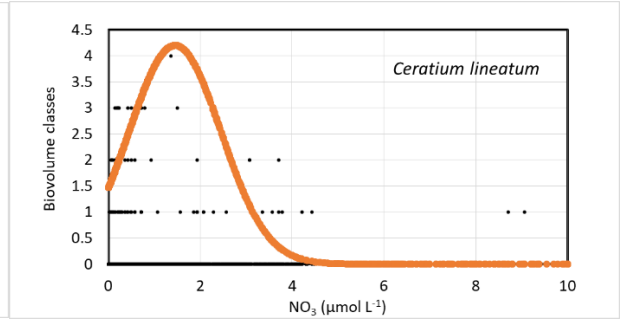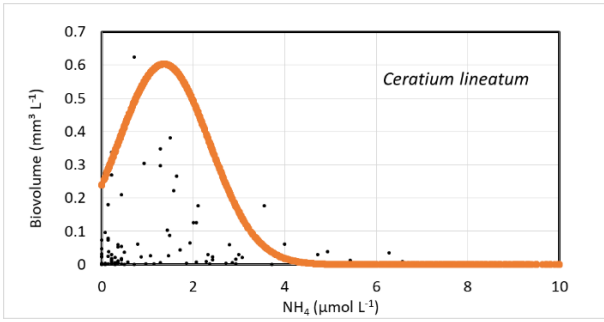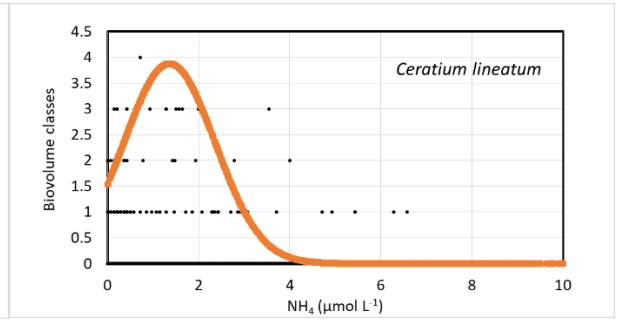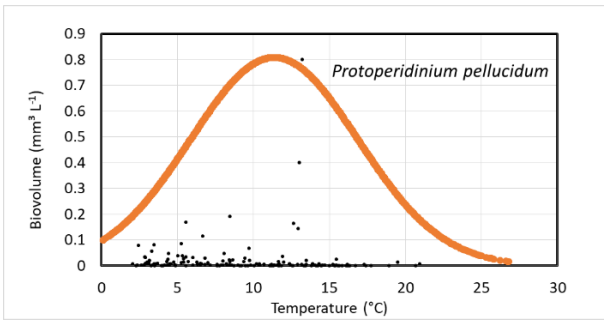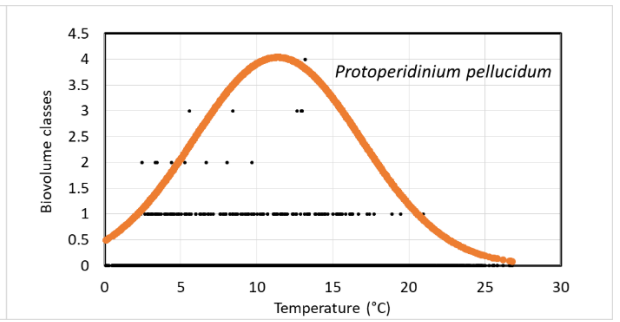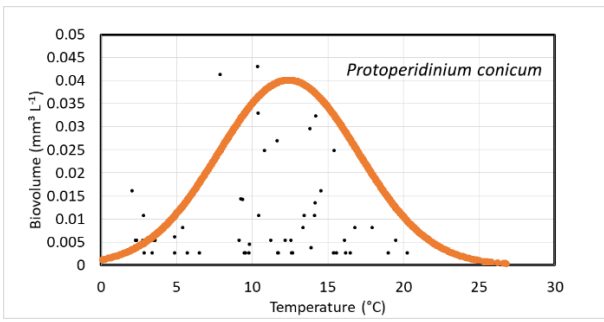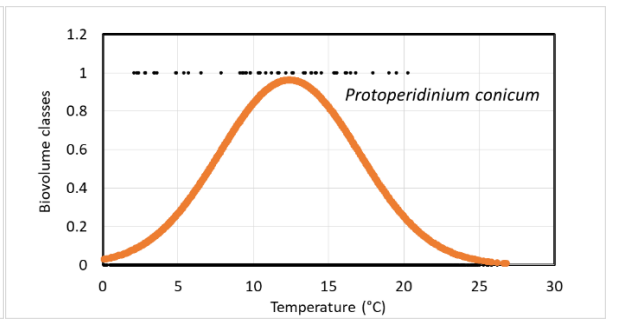

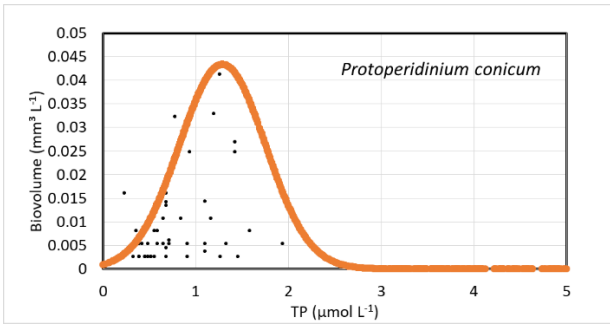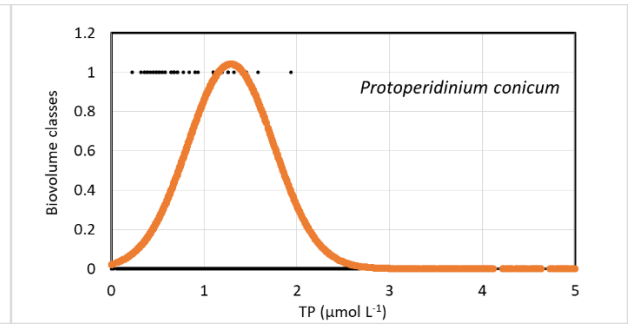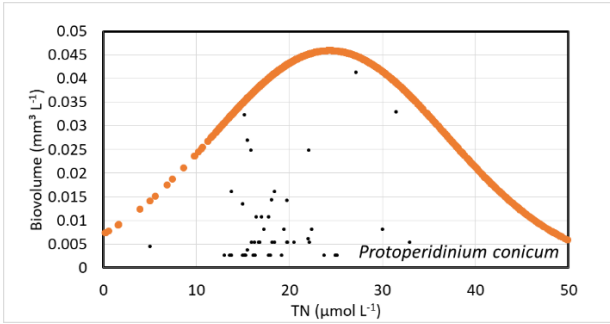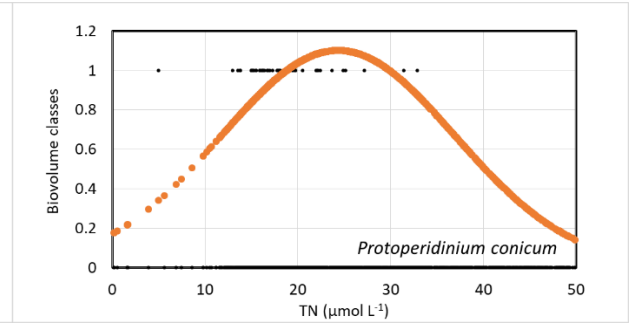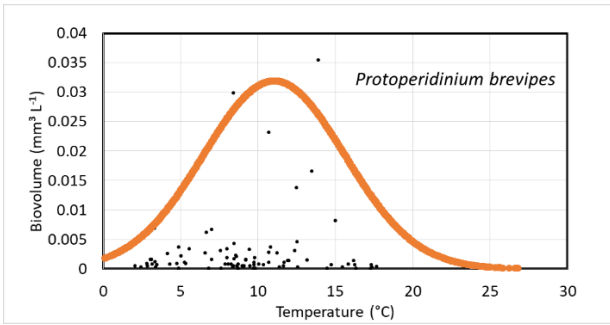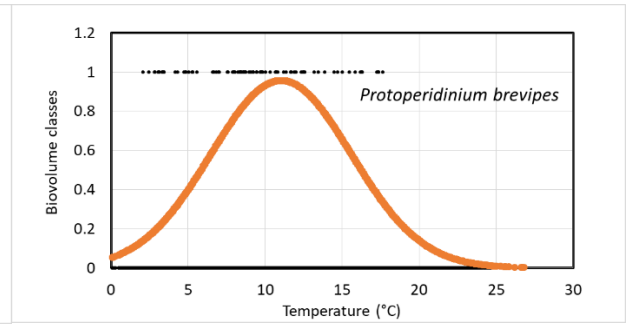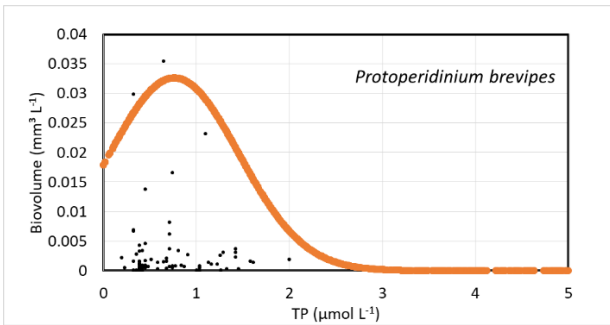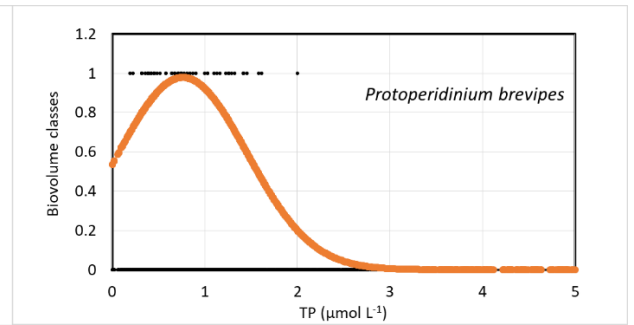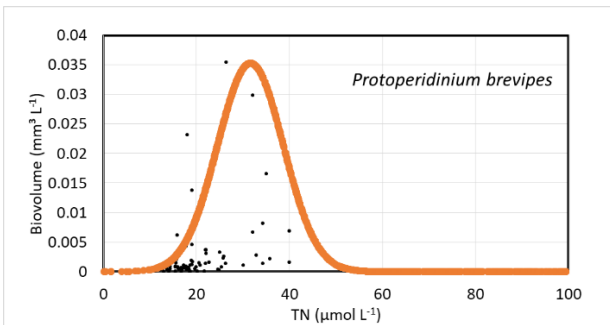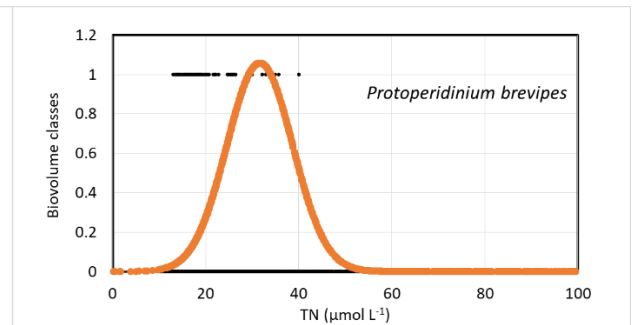



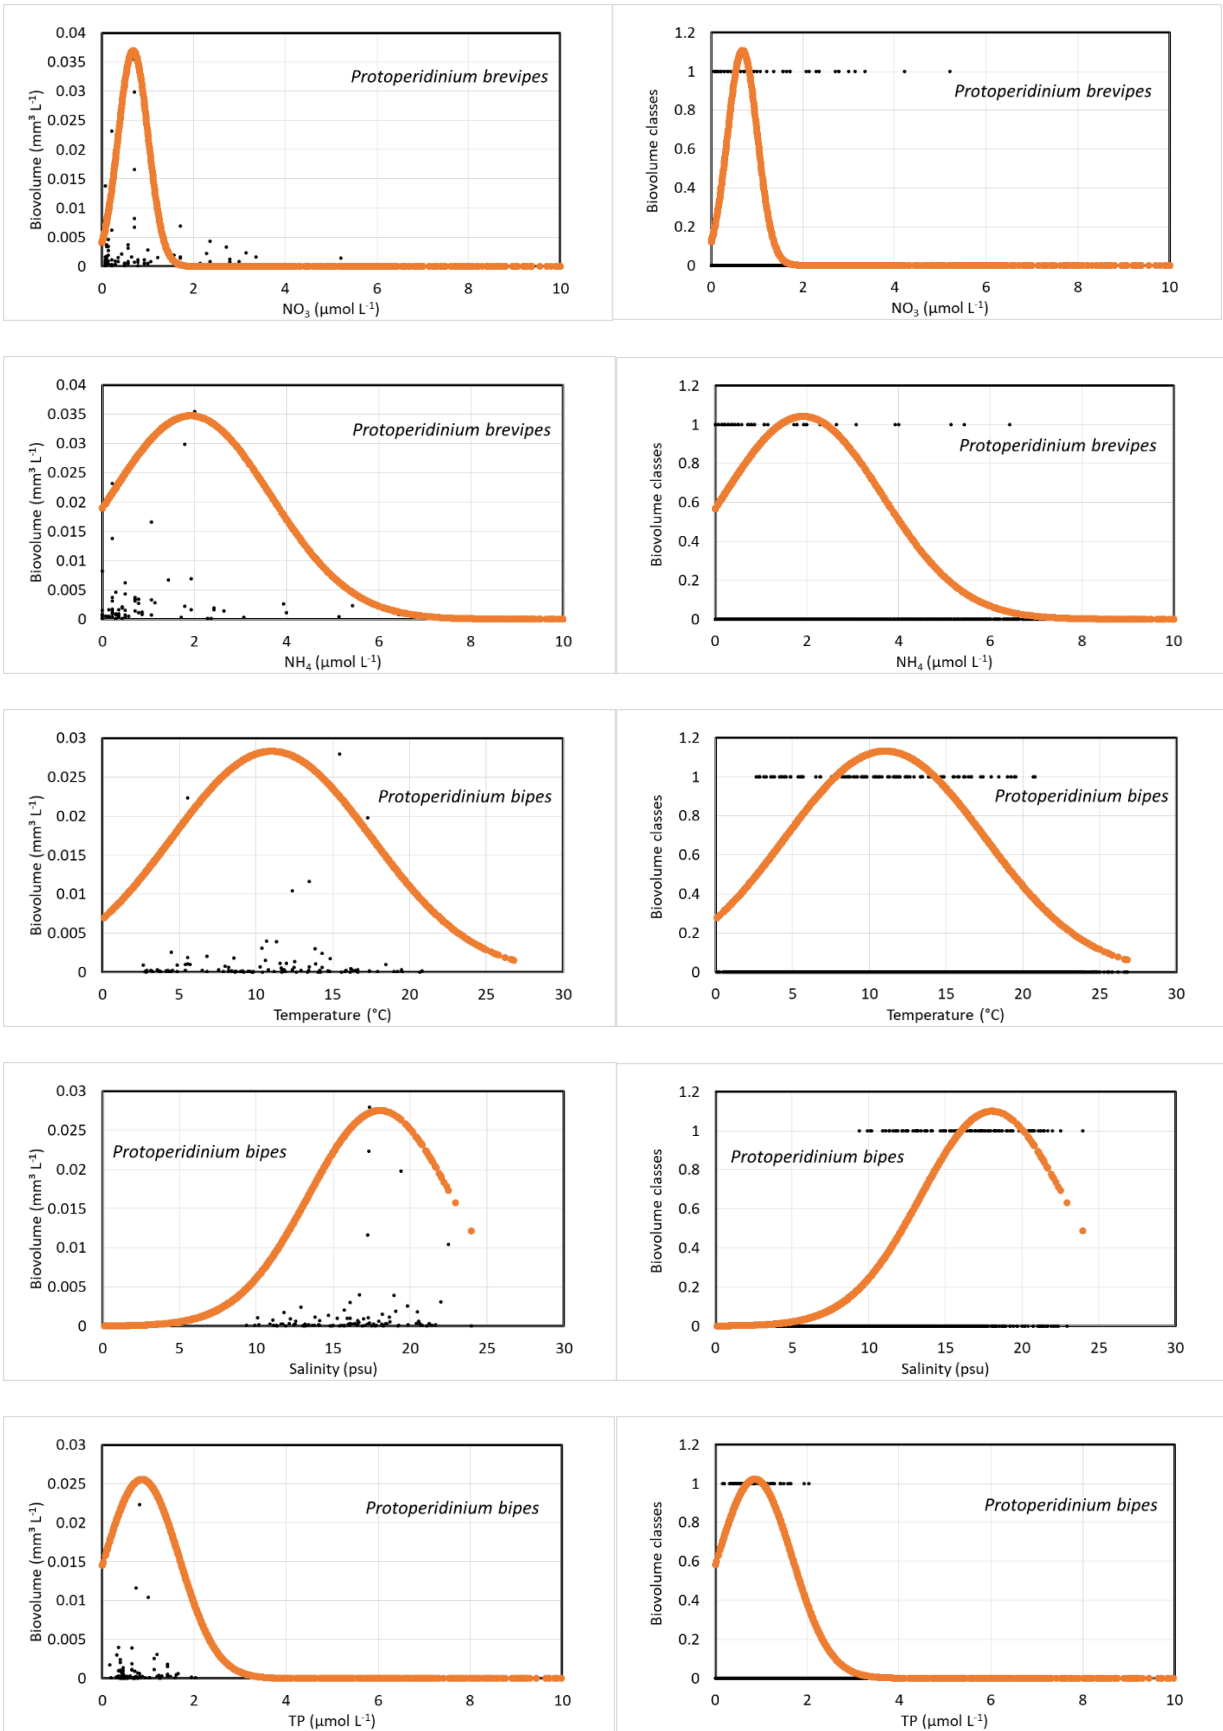

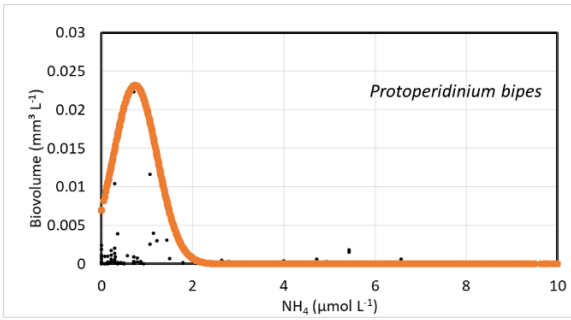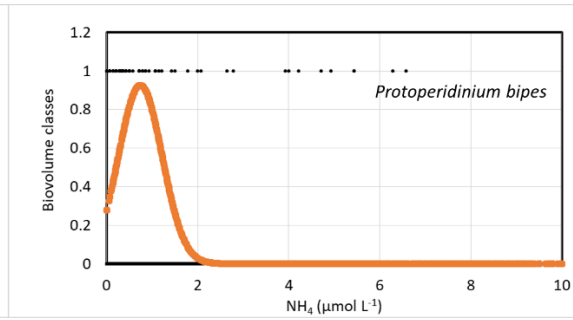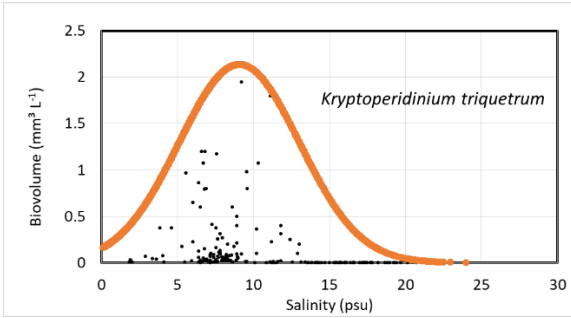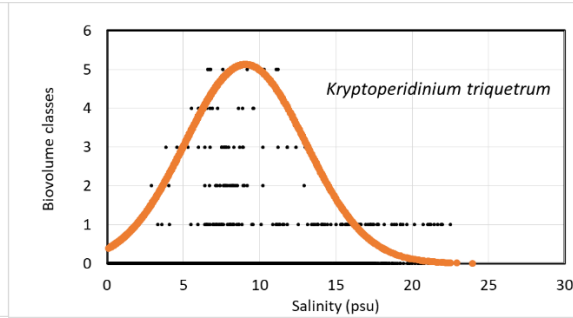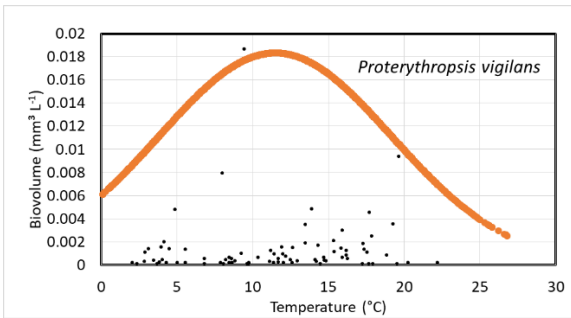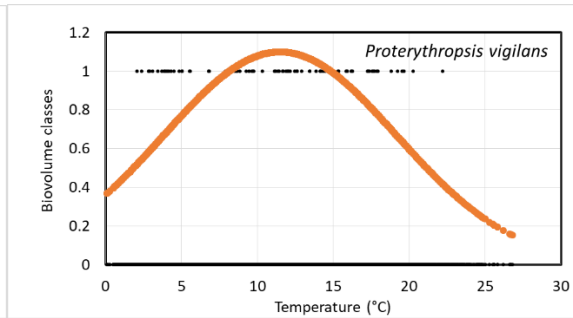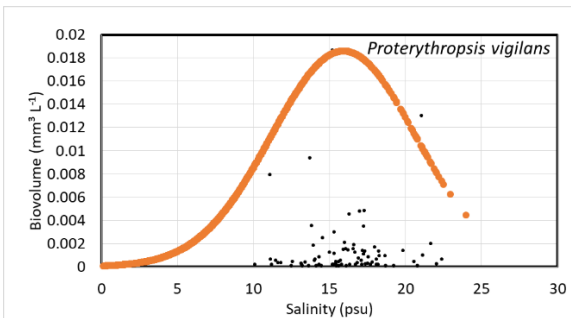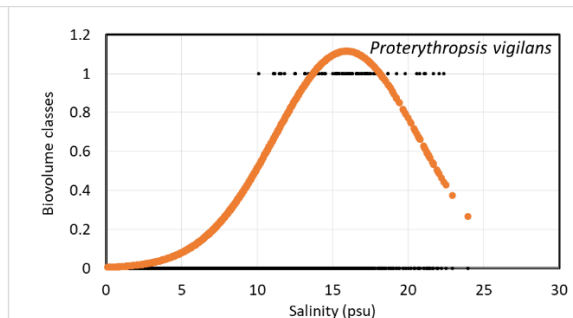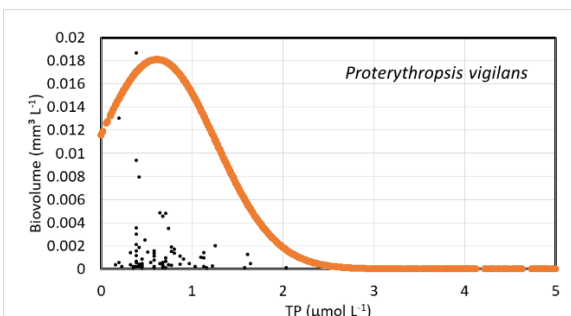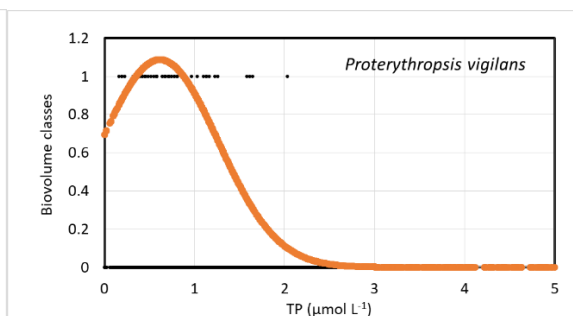

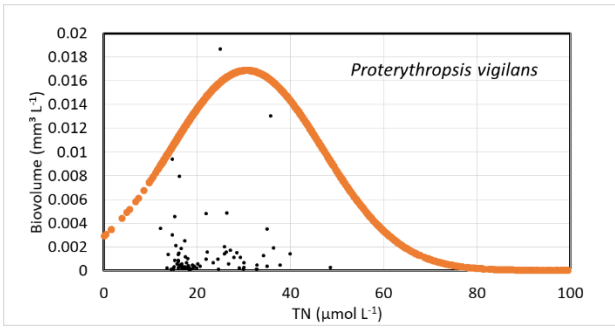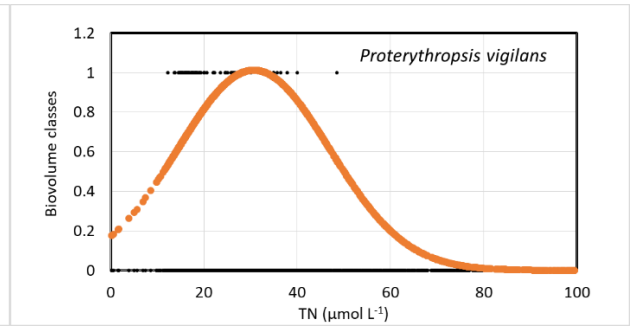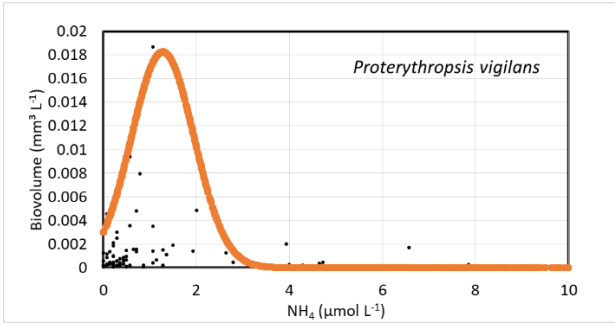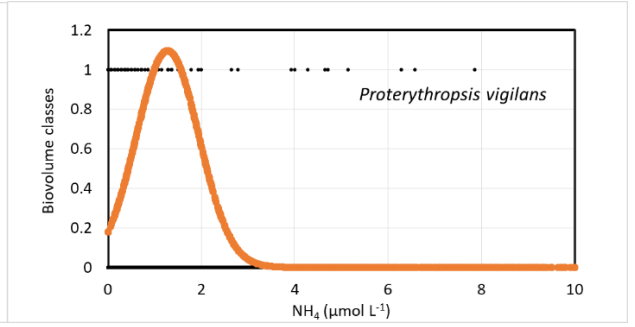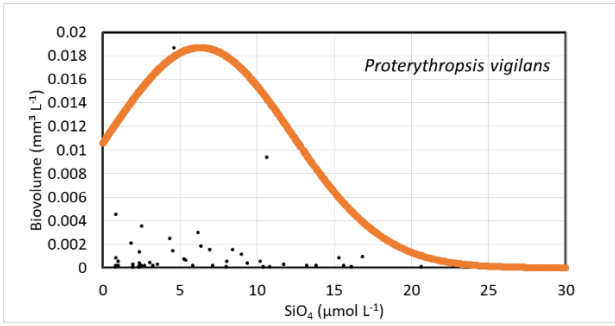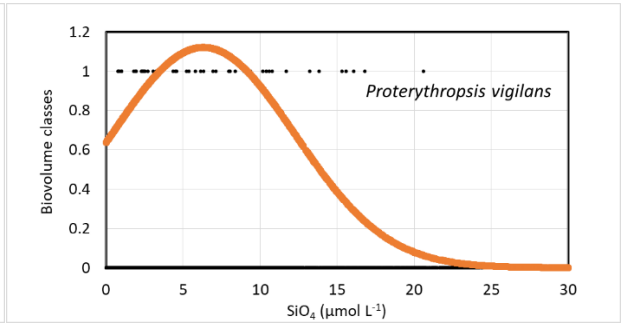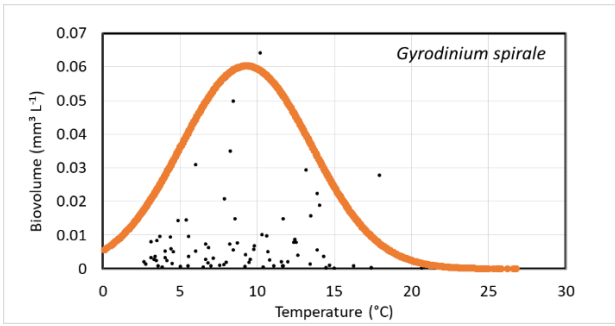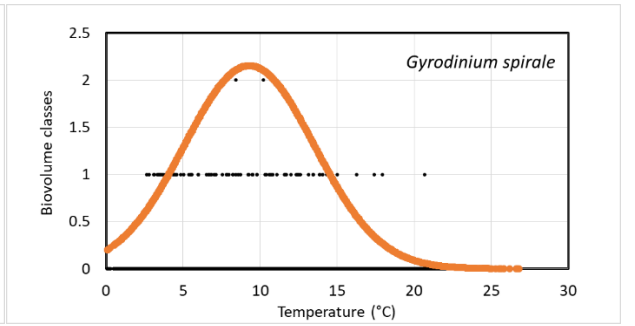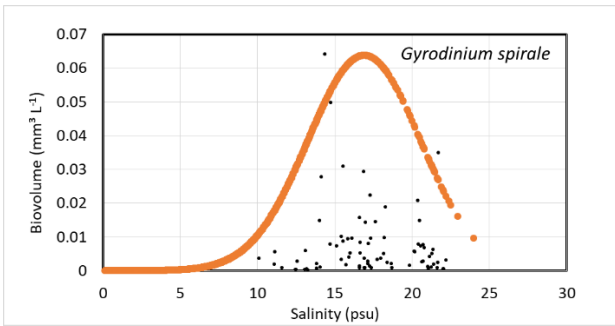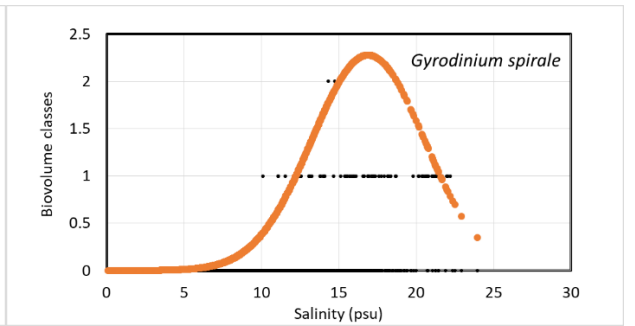

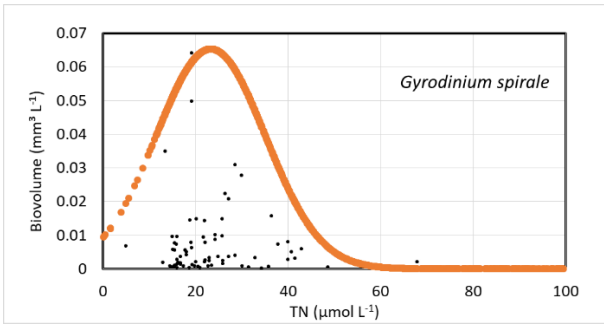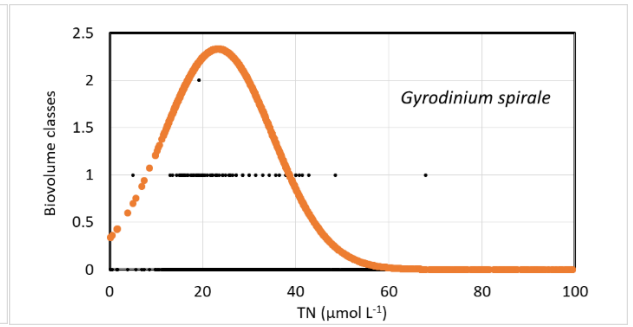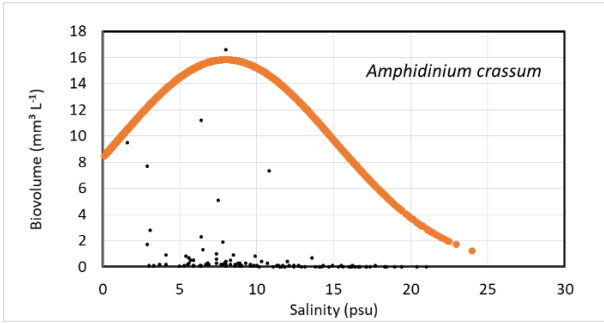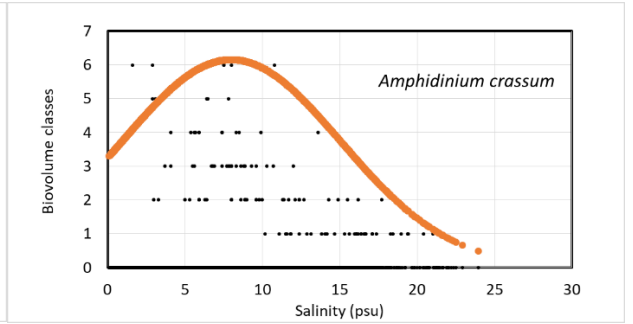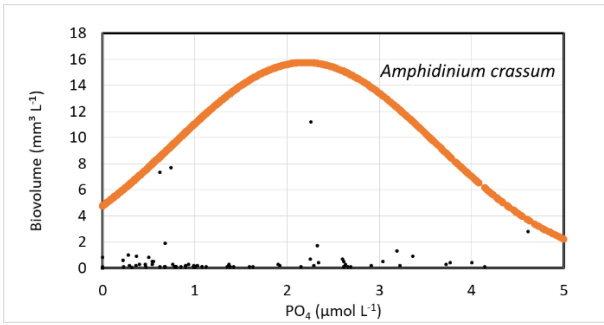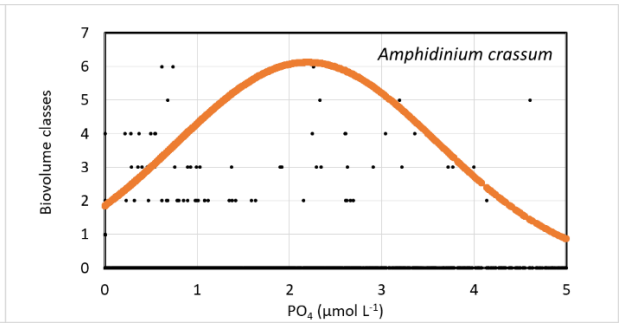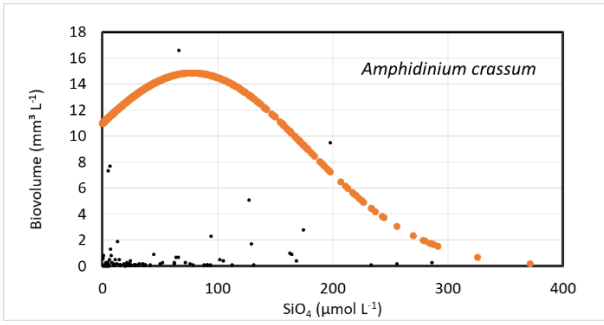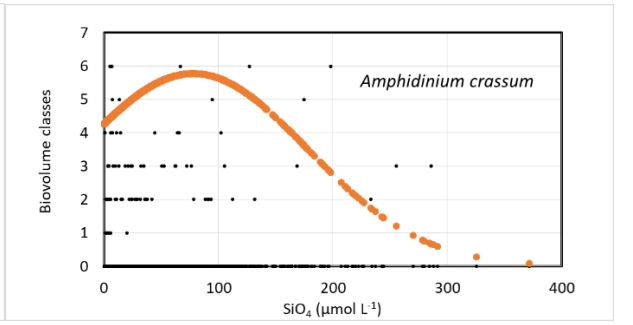

### Supplementary Figure S2.

The MDS plots showing the clustering of the obtained results at different Euclidian distances for the dinoflagellates *Amphidinium crassum*, *Ceratium fusus*, *Ceratium tripos* and *Prorocentrum micans*.

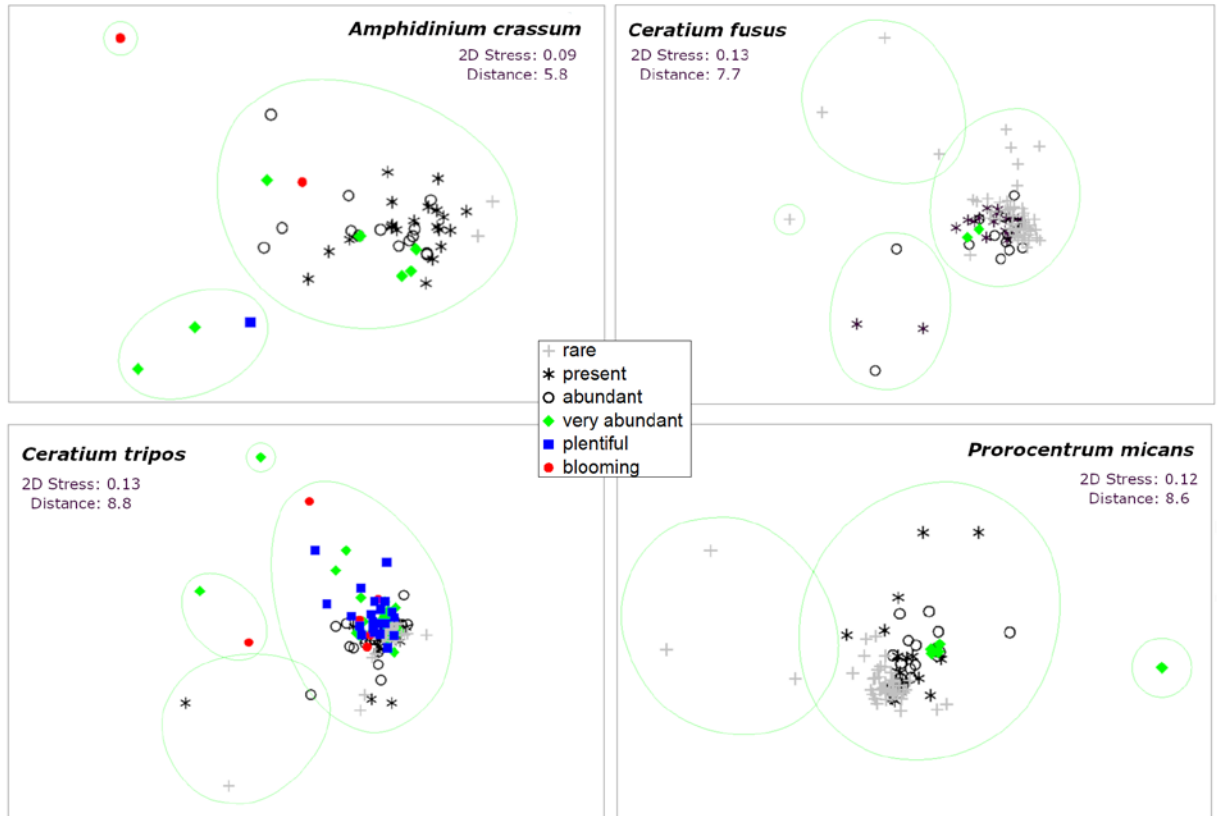

### Supplementary Figure S3.

Correlations between occurrence of the bloom-forming dinoflagellates at different concentrations and the sizes of their ecological niches in the Baltic Sea.

**A:** Dependence of the overall frequency of occurrence (Occurrence,  $n_{tot}$ ) of dinoflagellates on the salinity (S) niche width. **B:** Dependence of the frequency of occurrence of the dinoflagellate species within their individual niche limits and the total phosphorus (TP) niche width. **C:** Correlation between TN/TP ratio and the TP-niche width for all dinoflagellate species studied here.

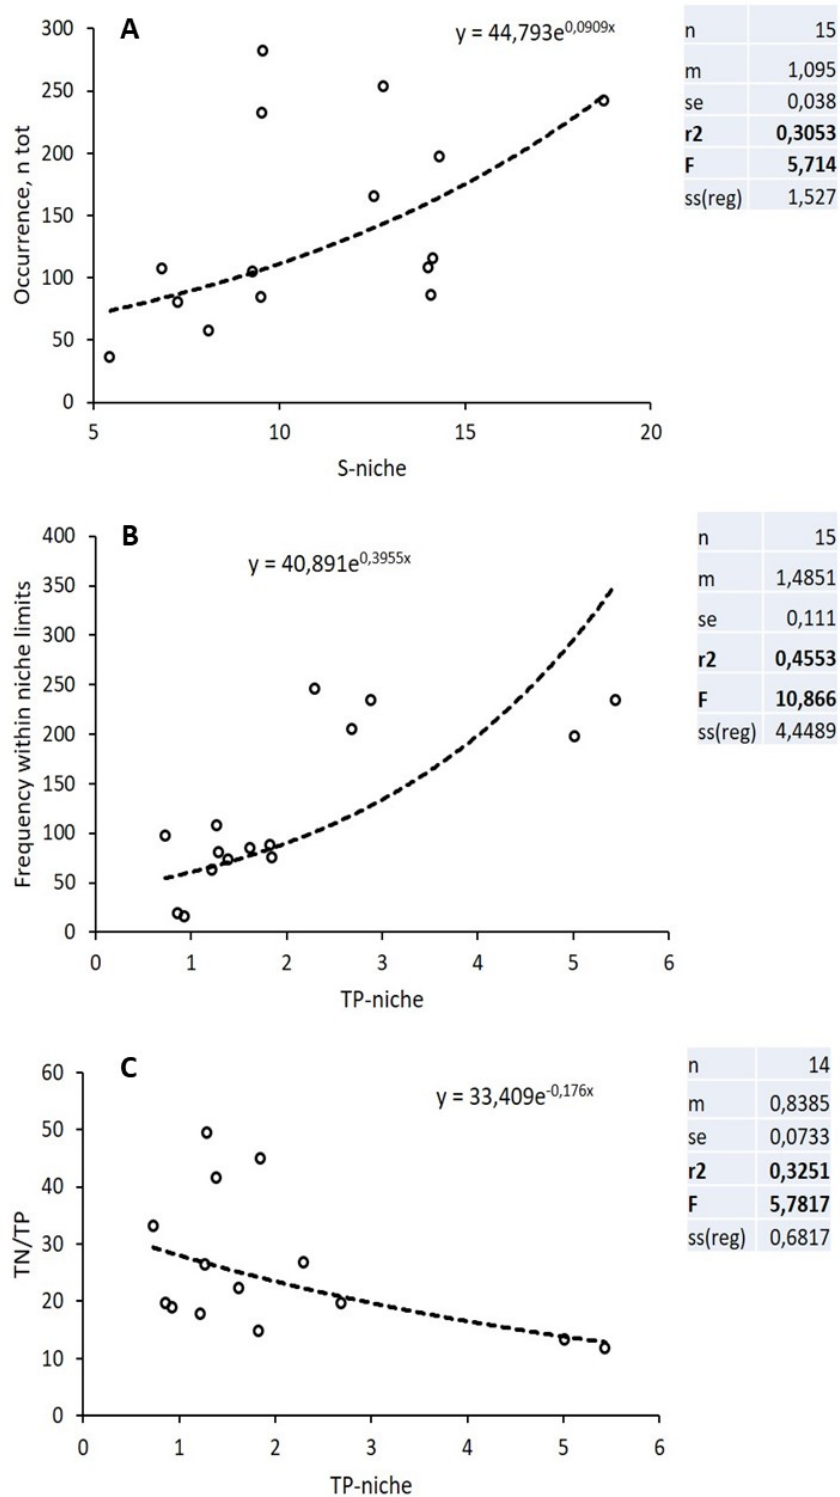

Supplement: mmc1.pdf [file mmc1.pdf]
